# Supplementary material for: High-throughout identification of telomere-binding ligands based on photo-induced electron transfer
Source: Royal Society of Chemistry journal article supplement (doi:10.1039/c5ra25612g), 2016-01-01
Supplement: c5ra25612g1.pdf [file c5ra25612g1.pdf]

## Supporting Information

### **High-throughput identifying telomere-binding ligands based on photo-induced electron transfer**

Zhilu Shi, Xiafei Zhang, Rui Cheng, Qi Zhang \* and Yan Jin\*

Key Laboratory of Applied Surface and Colloid Chemistry, Ministry of Education, Key  
Laboratory of Analytical Chemistry for Life Science of Shaanxi Province, School of Chemistry  
and Chemical Engineering, Shaanxi Normal University, Xi'an 710062, China

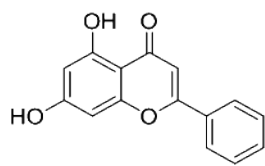

**Chrysin**

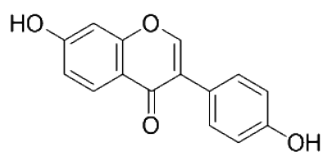

**Daidzein**

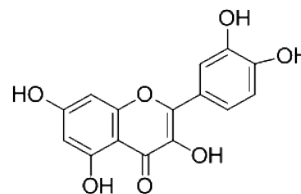

**Quercetin**

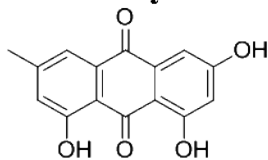

**Emodin**

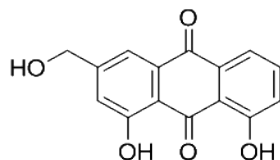

**Aloe-emodin**

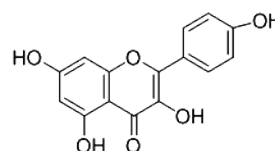

**Kaempferol**

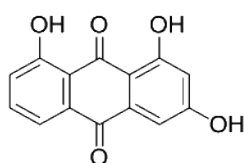

**Chrysophanol**

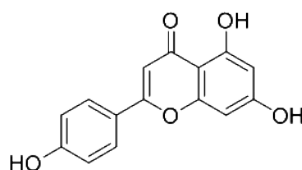

**Apigenin**

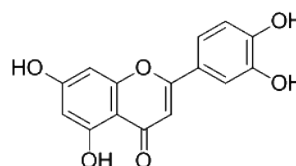

**Luteolin**

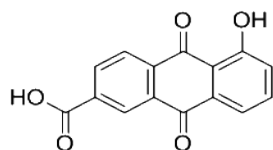

**Rhein**

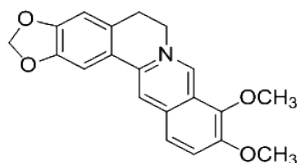

**Berberine**

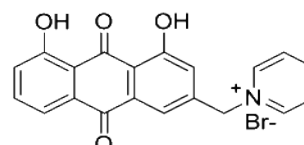

**AED**

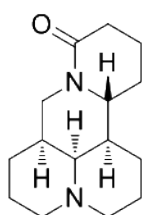

**Matrine**

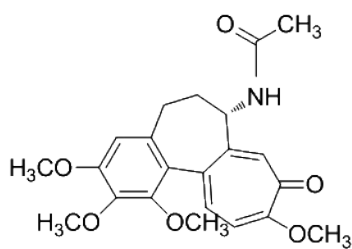

**Colchicin**

**Figure S1** The structure of G-quadruplex-binding ligands used in the assay.

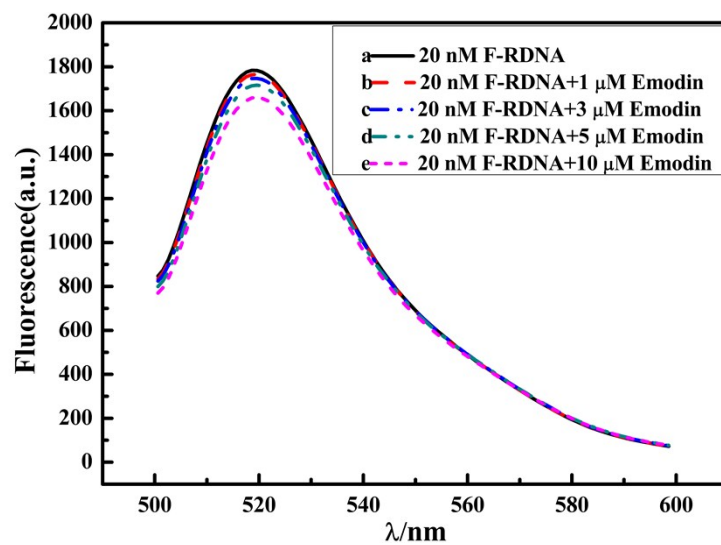

**Figure S2.** Fluorescence emission spectra of F-RDNA in the absence and presence of the different concentration of emodin. The concentration of emodin is 1, 2, 3  $\mu\text{M}$ , respectively.

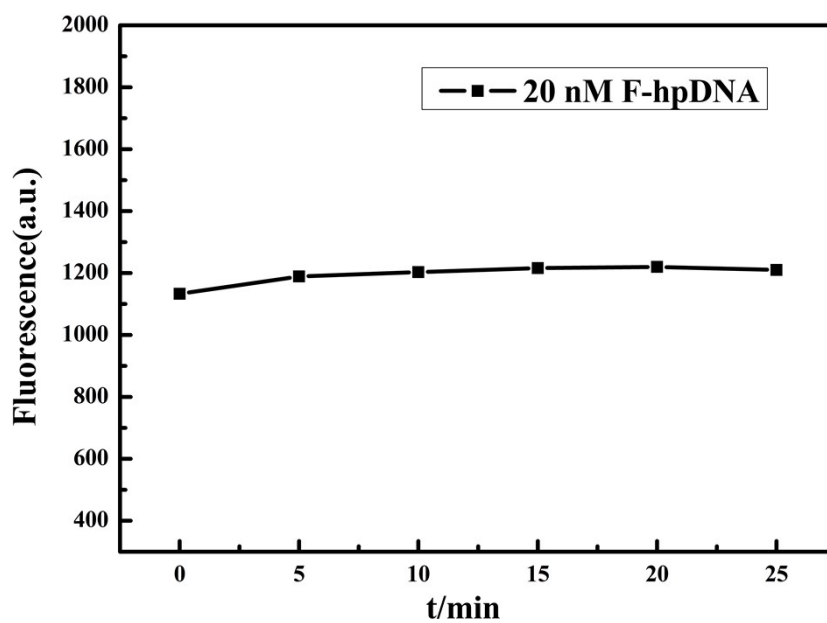

**Figure S3.** The effect of incubation time on the fluorescence intensity of F-hpDNA.

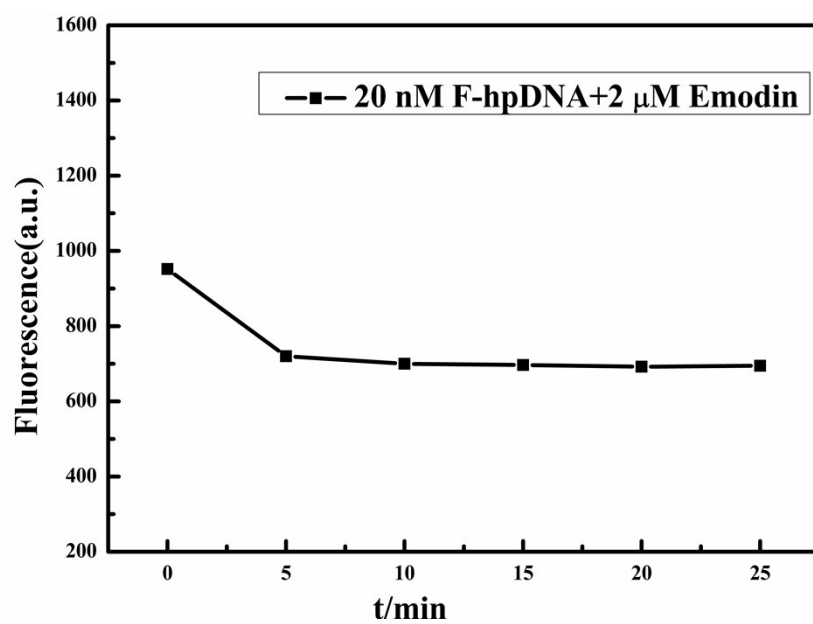

**Figure S4.** The effect of incubation time on the fluorescence intensity of F-hpDNA/Emodin.

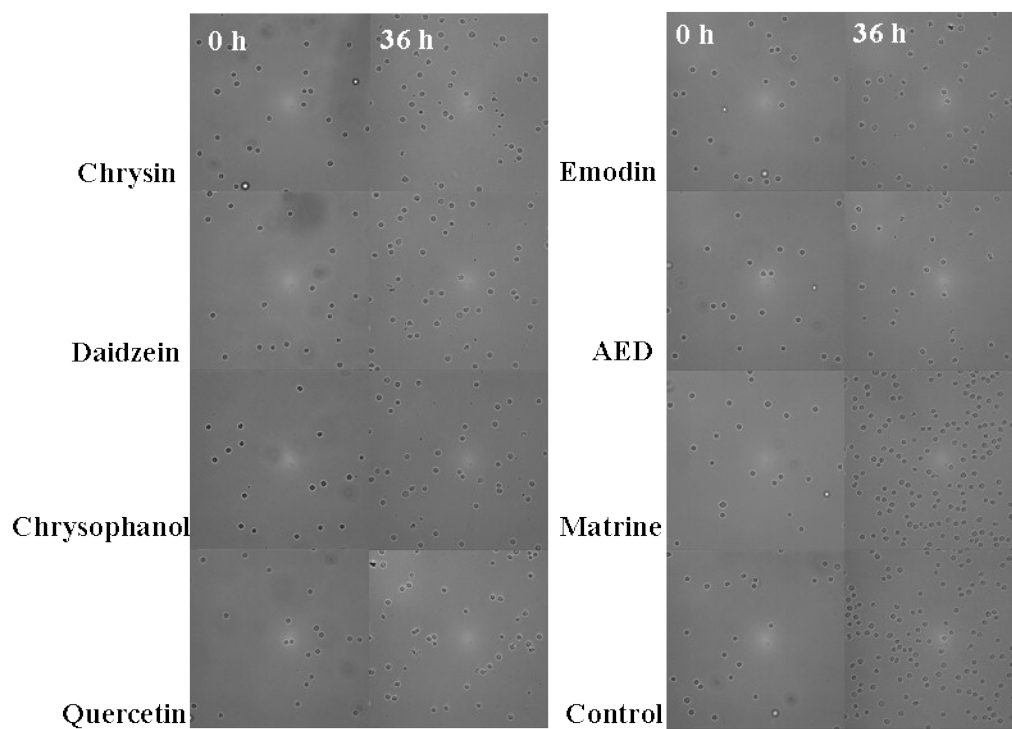

**Figure S5.** Bright-field image of CEM cells cultivated with 25  $\mu$ M chrysin/daidzein/chrysophanol/quercetin/emodin/AED/matrine/control at 0 h and 36 h.

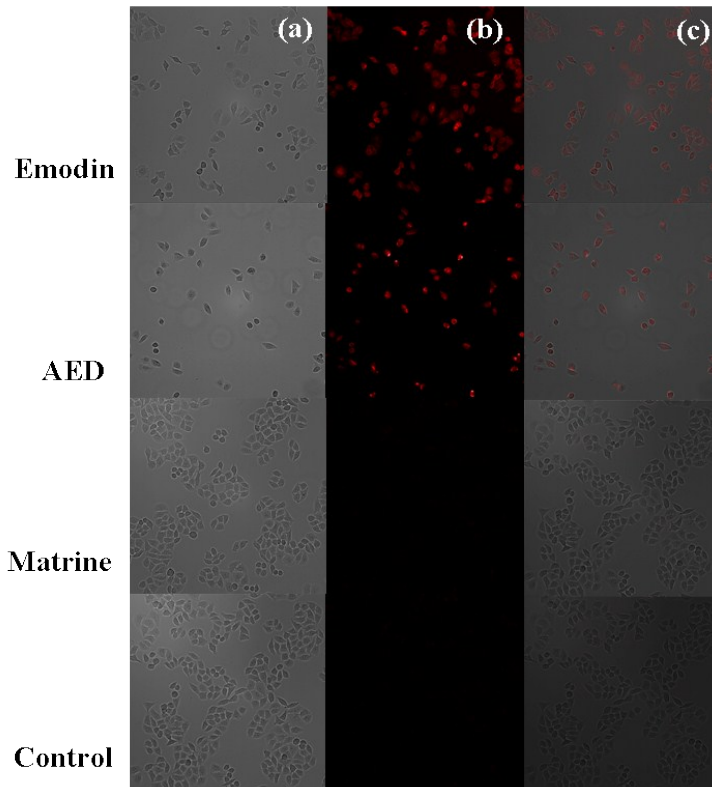

**Figure S6.** Bright-field image, fluorescence microscopy image and overlap image of HeLa cells cultivated in the absence and presence of 50  $\mu$ M drugs after 36 h.

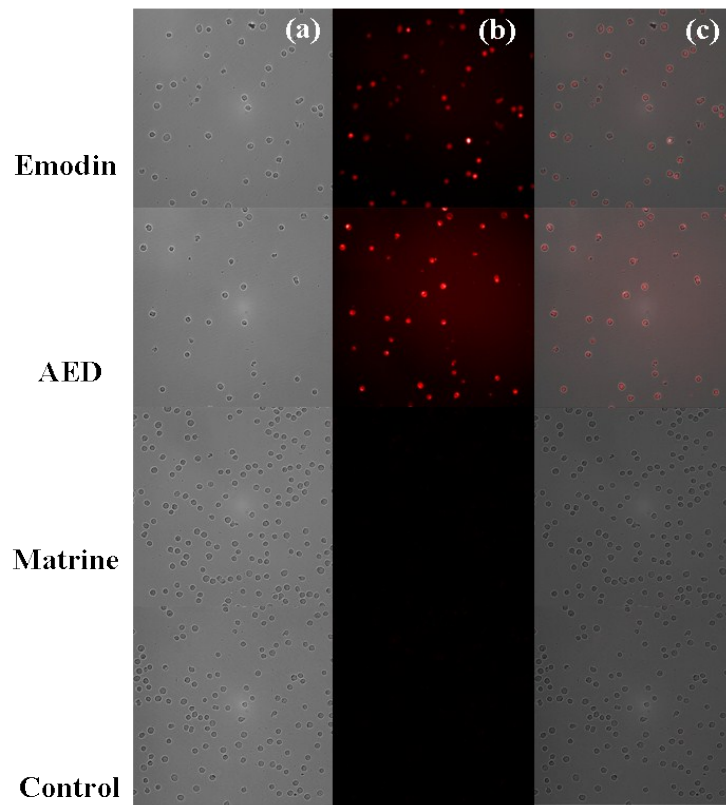

**Figure S7.** Bright-field image, fluorescence microscopy image and overlap image of CEM cells cultivated with 25  $\mu$ M emodin/AED/matrine/control after 36 h.
